# Supplementary material
Source: ML conference proceedings conference paper supplement (https://openaccess.thecvf.com/content/CVPR_2020/html/Haque_ILFO_Adversarial_Attack_CVPR_2020_paper.html)
Supplement: Supplementary file 1 [file Haque_ILFO_Adversarial_Attack_CVPR_2020_supplemental.zip]

Archive with 1 entries (1 files):
- 09824-supp/Appendix.pdf
